# Supplementary material for: Protein Profiling of RGS6, a Pleiotropic Gene Implicated in Numerous Neuropsychiatric Disorders, Reveals Multi-Isoformic Expression and a Novel Brain-Specific Isoform
Source: eNeuro. 2022 Jan 18;9(1):ENEURO.0379-21.2021. doi: 10.1523/ENEURO.0379-21.2021 (PMC8805202; doi:10.1523/ENEURO.0379-21.2021)
Supplement: Extended Data Figure 7-1 — Putative phosphorylation sites in the RGS6Lα1 protein. X denotes sites that were also predicted by PhosphoNet or have been confirmed as phosphorylated residues through mass spectrometry datasets. Download Figure 7-1, XLS file. [file enu-eN-NWR-0379-21-s06.xls]

## Sheet: Supplemental Table 1
	Phos. Site	Family	Sub-Family	Kinase	Δ Score	PhosphoNET	Prot. Mass Spec
	S5	Other		CK2b	1
		Other		KIS	3.6
	S19	Other	NEK	NEK6	1.7
	S20	CMGC	CDK	CDK5	1.4	X
		CMGC	ERK	MAPK1	1
		CMGC	P38	MAPK12	3.3
	Y26	TK	FAK	PYK2	1.7
		TK	PDGFR	KIT	1
	T34	STE	STE7	MAPsK1	1	X
		Other	NEK	NEK3	2.7
	T41	STE	STE7	MAP2K3	1.5	X
	T48	CAMK	CAMK1	CAMK1a	1.3	X
		CAMK	CAMKL	LKB	1.2
	S51	AGC	PKC	PKCt	1.8
	S54	Other	NEK	NEK2	1
	T61	STE	STE7	MAP2K3	4.3
		STE	STE7	MAP2K6	1.3
	S98	STE	STE7	MAP2K2	8
		STE	STE7	MAP2K7	5
	T103	CMGC	CDK	CK7	1.2
	T109	STE	STE7	MAP2K3	1	X
		STE	STE7	MAP2K6	3.3
	T129	STE	STE7	MAP2K2	1
		STE	STE7	MAP2K6	4.3
	Y151	TK	Tec	TXK	2.8	X
	T187	CAMK	DAPK	DAPK3	2.4	X
		STE	STE7	MAP2K1	1
		AGC	PKC	PKCδ	2.6
	T213	STE	STE7	MAP2K1	2
	Y234	TK	Fer	Fer	1.6
		TK	Src	Fyn	1.1
		TK	Src	Lck	1.4
		TK	Tec	Tec	3
	T237	STE	STE7	MAP2K1	4
	S240	Atypical	PIKK	DNAPK	4.9	X
	S244	CMGC	GSK	GSK3α	5.5	X	X
		CMGC	CDK	CDK2	2
		CMGC	CDK	CDK4	2
		CMGC	CDK	CDK6	1.5
		CMGC	JNK	MAPK9	1.5
		CMGC	JNK	MAPK10	1.3
	S244	CMGC	p38	MAPK11	2	X	X
		CMGC	p38	MAPK14	1.2
	S250	Atypical	PIKK	DNAPK	3	X
	T256	Other		Wnk	3	X
		CAMK	DAPK	DAPK3	1.3
		TKL	MLK	ILK	2.9
		TKL	MLK	MAPK3K11	3.3
	T257	AGC	PKG	PKG1	1.1	X
		CAMK	DAPK	DAPK3	1.9
	T266	CAMK		PHK	1.8	X
	S280	AGC	GRK	GRK1	1.3	X
	S285	Other	NEK	NEK9	3.3
	Y289	TK	Eph	EphA3	1.3	X
	T290	STE	STE7	MAP2K1	2
	Y293	TK	EGFR	EGFR	1
		TK	EGFR	ErbB2	1
	T301	CMGC	GSK	GSK3α	3.2	X
		CMGC	GSK	GSK3β	1.1
		Atypical	PIkk	FRAP	1.3
		CMGC	CDK	CDC2	1.1
		CMGC	ERK	MAPK7	2.1
	?	CMGC	JNK	MAPK9	1.2
	S311	STE	STE7	MAP2K2	2
	S326	CAMK	CAMK1	CAMK4	1.2	X
		Atypical	PIKK	ATM	2.7
		AGC	PKC	PKCh	1.3
	S406		CK1	CK1d	1.1	X
	Y407	TK	Tec	TXK	1	X
	S411	AGC	GRK	GRK5	1.2	X
	Y430	TK	FAK	PYK2	6
		TK	Fer	Fer	3
		TK	Src	Fyn	1
		TK	Src	Brk	1.3
	S437	CAMK	CAMKL	AMPK	1	X	X
	Y438	TK	Axl	Mer	2	X
		TK	Src	Brk	2.5
	Y447	TK	Eph	EphA3	2.3	X
		TK	Src	Lyn	1.9
		TK	Src	Lck	1.2
		TK	PDGFR	CSF1R	3.1
	S459	AGC	PKG	PKG1	1.6	X	X
	S465	AGC	DMPK	ROCK1	1.5
		CAMK	DMPK	DAPK3	1.7
		Other	Aurora	Aurora B	1.5
	S466	AGC		AKT	2
		AGC	DMPK	ROCK1	3.3
		AGC		PKA	4.8
		AGC	PKC	PKCα	2
		AGC	PKG	PKG2	1.3
		AGC	RSK	RSK1	1
		CAMK	CAMK2	CAMK2α	3.1
		CAMK	DAPK	DAPK3	2.2
		CAMK		MAPKAPK	1.1
		CAMK		PHK	2.1
		STE	STE20	PAK1	2.7
	?	Other	Aurora	Aurora A	1.4
	T484	CAMK	PKD	PKD1	1.2	X
		STE	STE7	MAP2K3	2.5
		STE	STE7	MAP2K6	2.7
	S489	STE	STE7	MAP2K7	1.8
		AGC	BARK	GRK2	1.9
		AGC	GRK	GRK1	2.4
		AGC	PKC	PKCg	1.6
	S490			KIS	1		X
		AGC	BARK	GRK2	2.1
		AGC	GRK	GRK2	4
